# Supplementary material for: Generalized and high temperature synthesis of a series of crystalline mesoporous metal oxides based nanocomposites with enhanced catalytic activities for benzene combustion
Source: Royal Society of Chemistry journal article supplement (doi:10.1039/c3ta01505j), 2013-01-01
Supplement: c3ta01505j.pdf [file c3ta01505j.pdf]

## Supplementary Information

### **Generalized and high temperature synthesis of a series of crystalline mesoporous metal oxides based nanocomposites with enhanced catalytic activities for benzene combustion**

Fujian Liu <sup>a, b</sup>, Shufeng Zuo <sup>a</sup>, Xiaodan Xia <sup>a</sup>, Jing Sun <sup>c</sup>, Yongcun Zou <sup>c</sup> Liang Wang <sup>c</sup>, Chunguang Li <sup>c</sup> and Chenze Qi\* <sup>a</sup>

<sup>a</sup> *Zhejiang Key Laboratory of Alternative Technologies for Fine Chemicals Process, Shaoxing University, Shaoxing, 312000, PR China, Email address: [qichenze@usx.edu.cn](mailto:qichenze@usx.edu.cn)*

<sup>b</sup> *Key Lab of Applied Chemistry of Zhejiang Province, Department of Chemistry, Zhejiang University, Hangzhou 310007, PR China.*

<sup>c</sup> *State Key Laboratory of Inorganic Synthesis and Preparative Chemistry and College of Chemistry, Jilin University, Changchun 130012, PR China.*

## Supporting figure captions

**Figure S1** Wide angle XRD patterns of crystalline mesoporous (a)  $\text{Cr}_2\text{O}_3$ , (b)  $\text{Ce}_{0.5}\text{Zr}_{0.5}\text{O}_2$ , (c)  $\text{SnO}_2$  (d)  $\text{ZrO}_2$ , (e)  $\text{CeO}_2$ , (f)  $\text{TiO}_2$ , and (g)  $\text{Al}_2\text{O}_3$ .

**Figure S2**  $\text{N}_2$  isotherms of crystalline mesoporous (a)  $\text{ZrO}_2$ , (b)  $\text{TiO}_2$ , (c)  $\text{Ce}_{0.5}\text{Zr}_{0.5}\text{O}_2$ , (d)  $\text{Fe}_2\text{O}_3$ , (e)  $\text{Cr}_2\text{O}_3$  and (f)  $\text{SnO}_2$ . The isotherm for (a)-(e) are offset by 400, 300, 200, 100 and 50  $\text{m}^2/\text{g}$ , respectively along the vertical axis for clarity.

**Figure S3** TEM images of (A-C) 10% $\text{MnO}_x$ /P4VP- $\text{CeO}_2$  and (D-F) 0.2%Pt/10% $\text{MnO}_x$ /P4VP- $\text{CeO}_2$ .

**Figure S4** Small angle XRD patterns of (a) P4VP- $\text{CeO}_2$ , (b) 10% $\text{MnO}_x$ /P4VP- $\text{CeO}_2$ , and (c) 0.2%Pt/10% $\text{MnO}_x$ /P4VP- $\text{CeO}_2$ .

**Figure S5**  $\text{Pt}_{4f}$  XPS spectrum of 0.2% $\text{PtO}_x$ /10% $\text{MnO}_x$ /P4VP- $\text{CeO}_2$ .

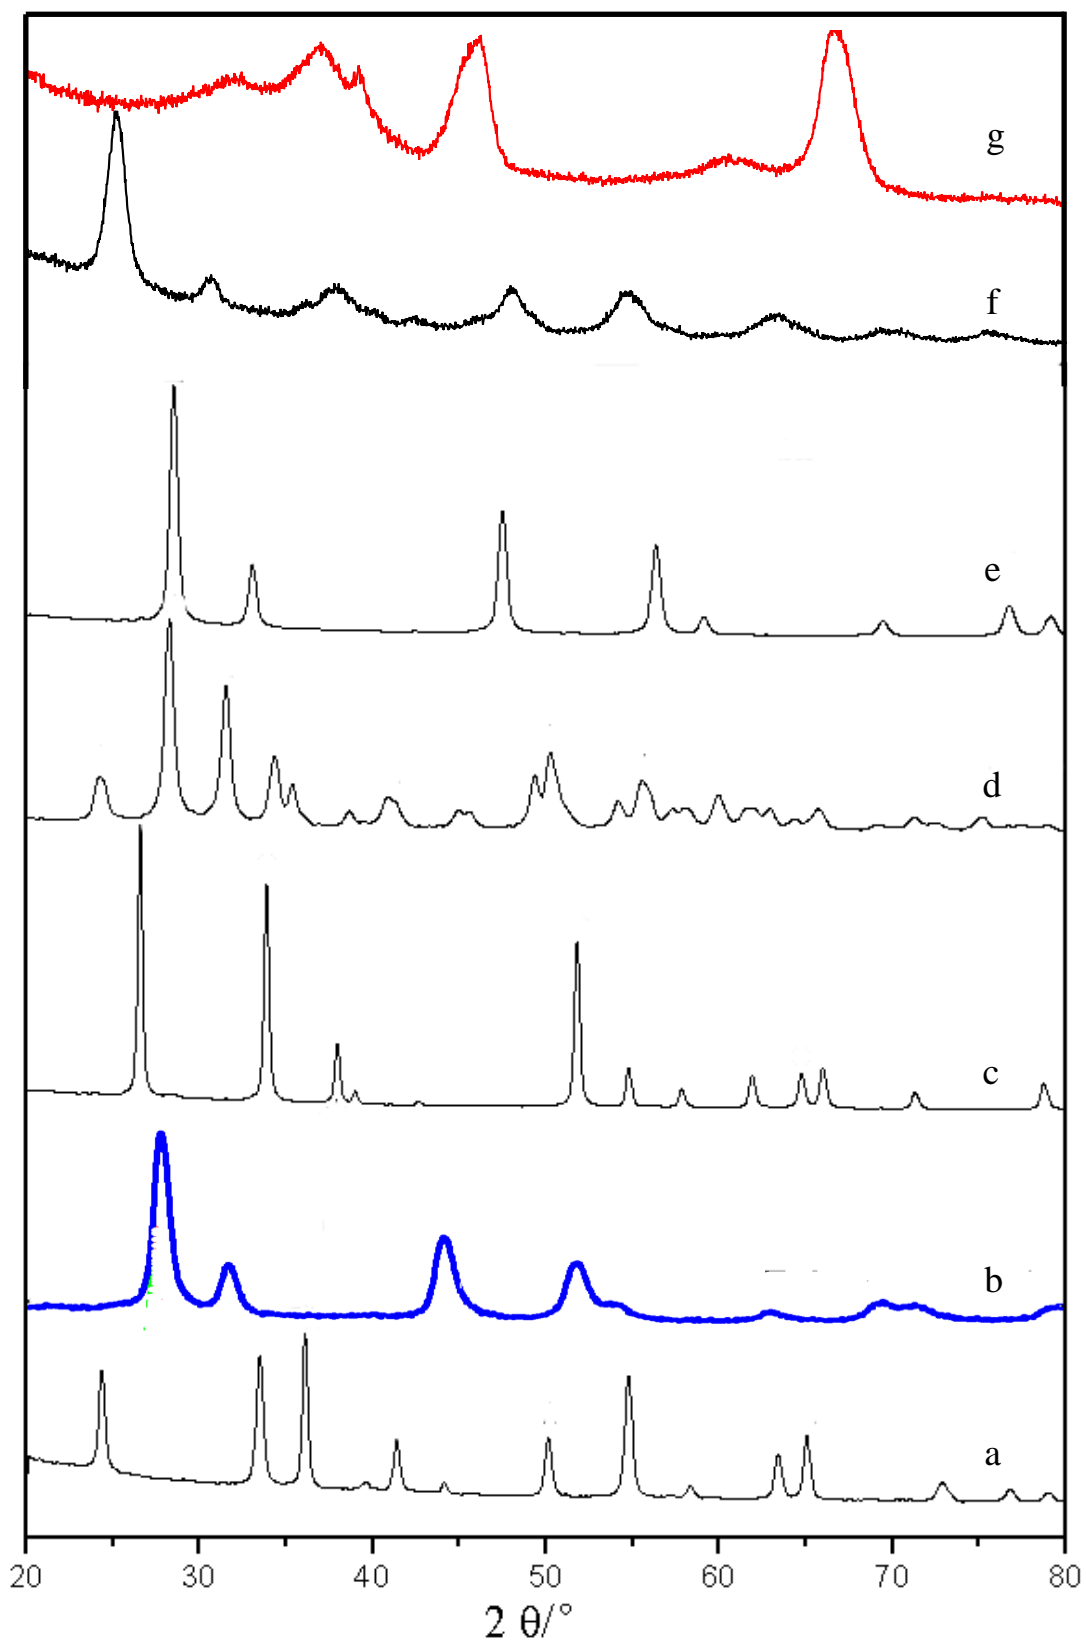

**Figure S1**

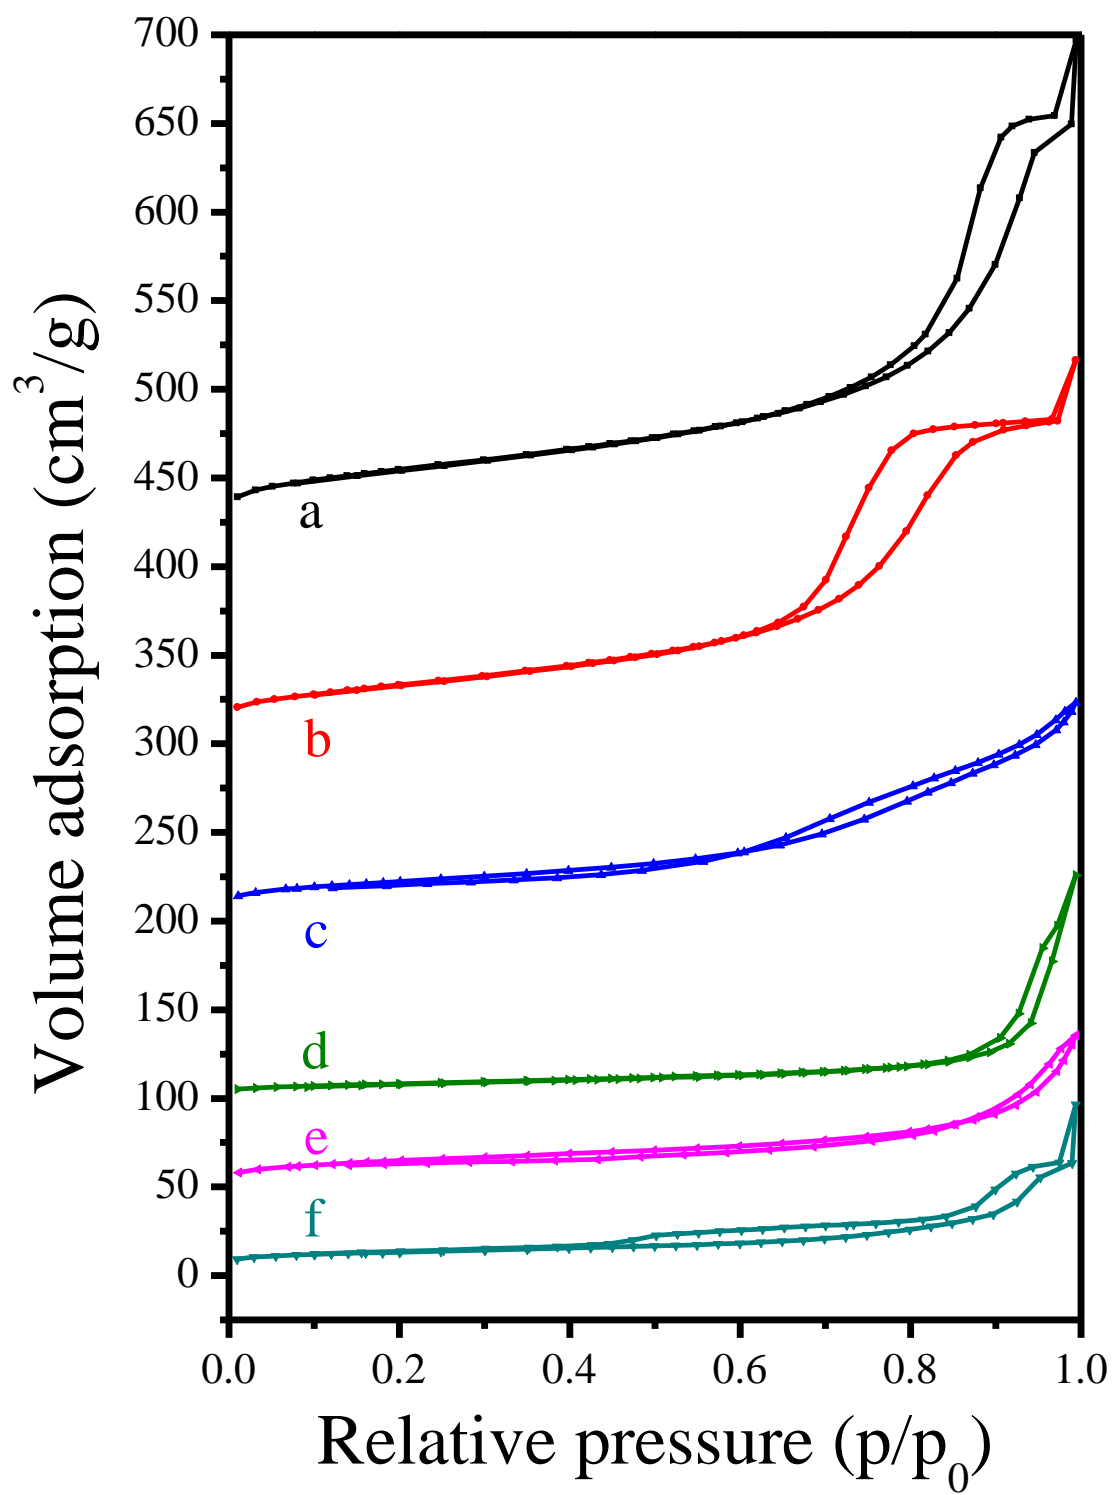

Figure S2

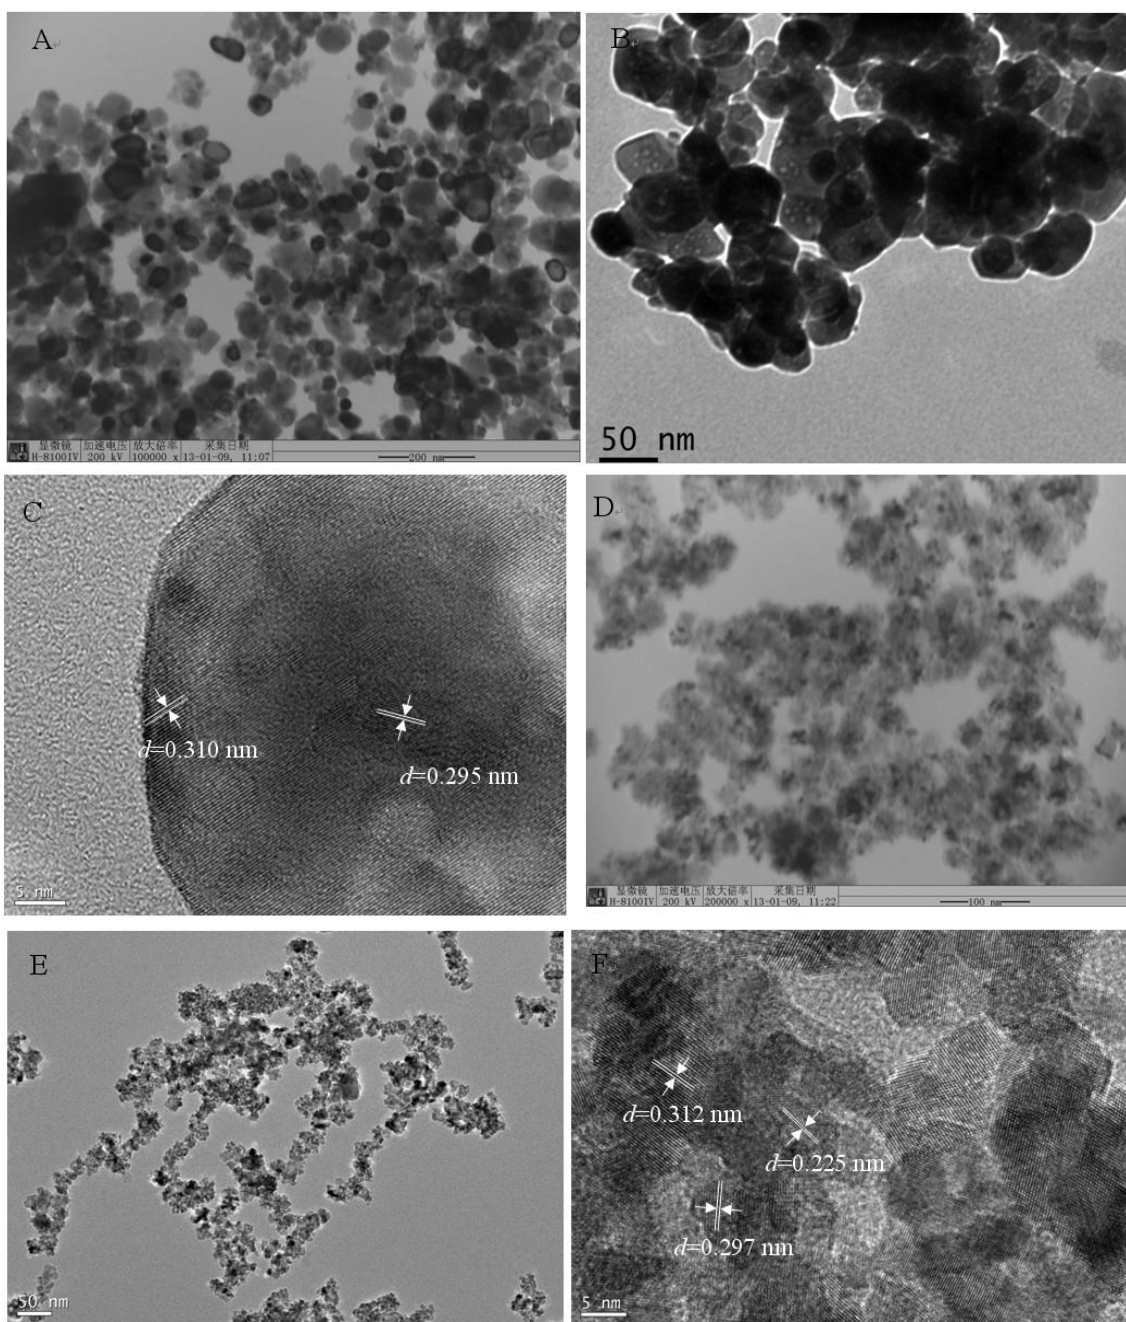

**Figure S3**

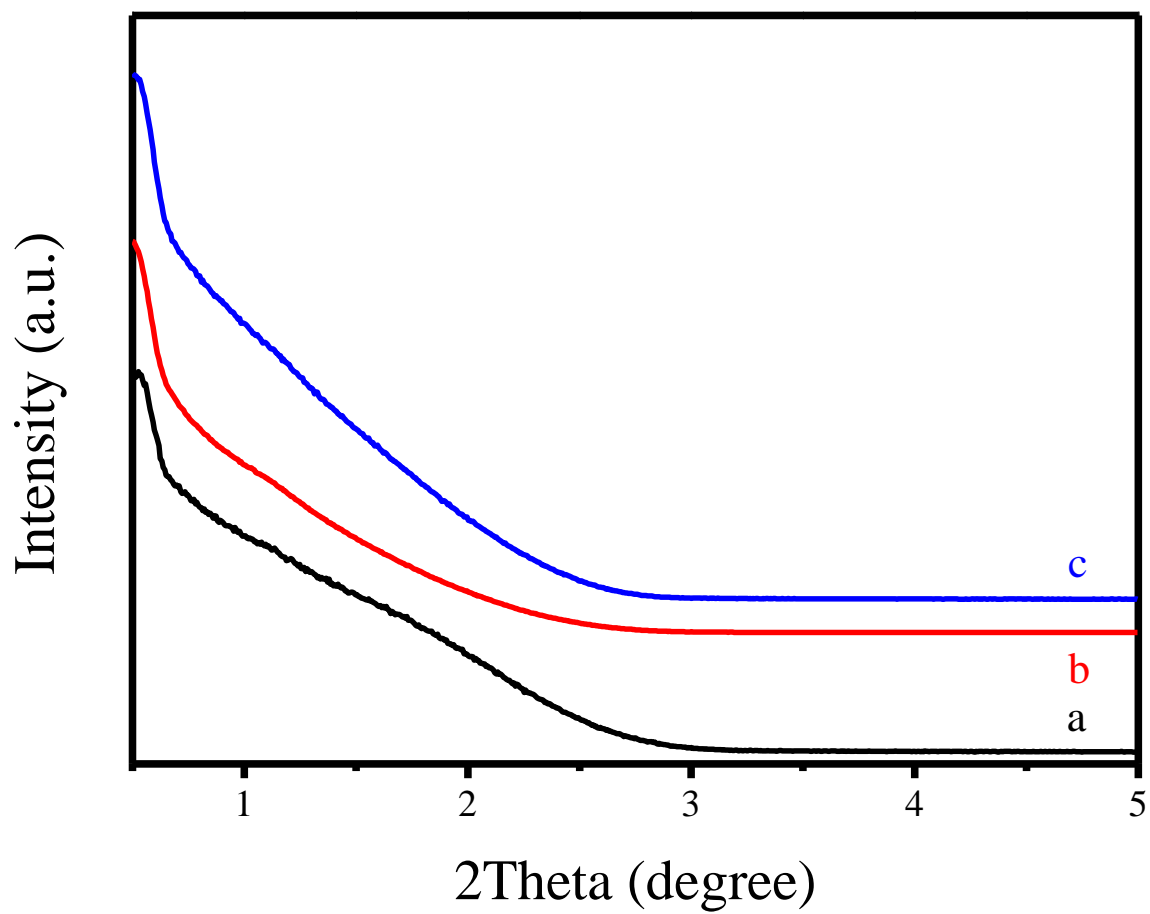

**Figure S4**

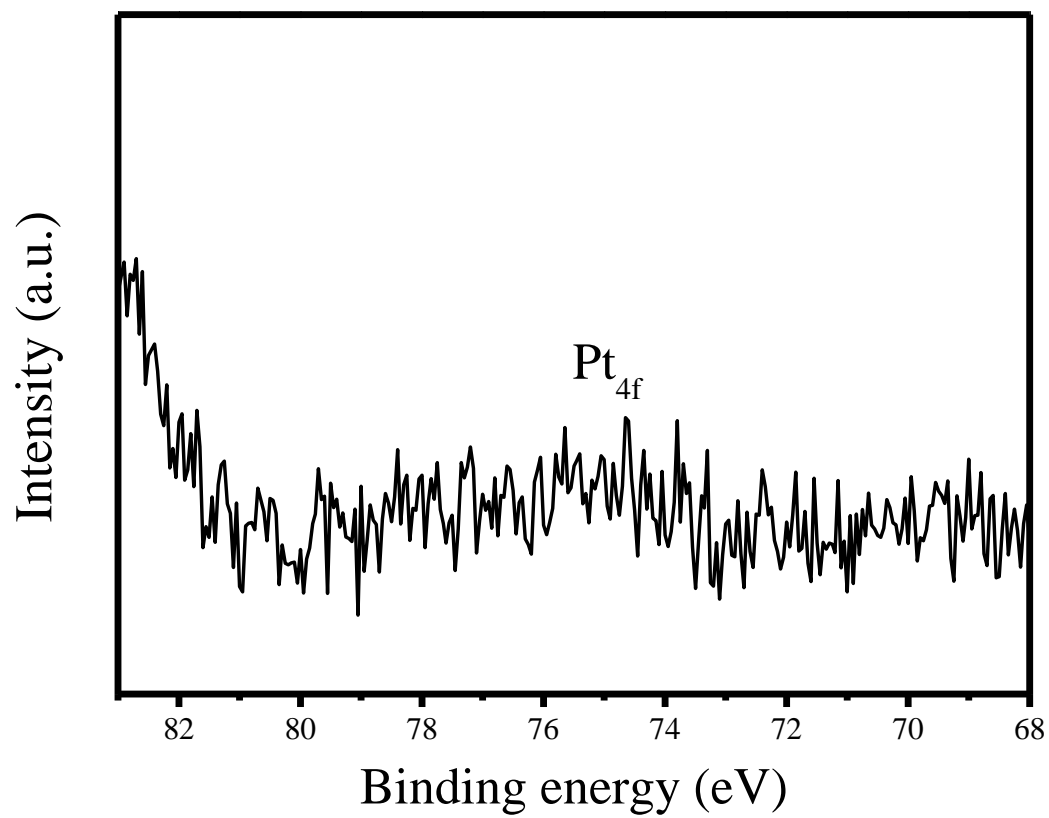

**Figure S5**
